# Supplementary material for: A molten salt-based nitridation approach for synthesizing nanostructured InN electrode materials
Source: Royal Society of Chemistry journal article supplement (doi:10.1039/d0ra07172b), 2020-01-01
Supplement: d0ra07172b1.pdf [file d0ra07172b1.pdf]

## Supporting Information

### A molten salt-based nitridation approach for synthesizing nanostructured InN electrode materials

Gani Purwiandono,<sup>1,2</sup> Kazuhiro Manseki<sup>1\*</sup> and Takashi Sugiura<sup>1</sup>

<sup>1</sup>*The Graduate School of Natural Science and Technology, Gifu University, 501-1193, Japan*

<sup>2</sup>*Department of Chemistry, Universitas Islam Indonesia, 55584, Indonesia*

#### Contents

- Table S1: The melting points of LiCl-KCl molten salt systems.
- Fig. S1: XPS spectra of InN samples: (a) whole region, (b) In 3d, (c) Li 1s, (d) Cl 2p and (e) K 2p.
- Fig. S2: SEM images of InN crystals prepared by the reaction of InCl<sub>3</sub>, LiNH<sub>2</sub> and LiCl-KCl at (a) 350°C, (b) 400°C, (c) 450°C, (d) 500°C and (e) 550°C
- Fig. S3: Brunauer-Emmett-Teller (BET) isotherms and Barret-Joyner-Halenda (BJH) pore-size distribution (inset) of InN synthesized at 400°C, 450°C and 500°C.
- Fig. S4: XRD patterns of InN synthesized using InCl<sub>3</sub> and LiNH<sub>2</sub> without LiCl-KCl. The reactions were carried out at 400°C, 450°C, 500°C and 550°C.
- Fig. S5: SEM images of InN synthesized using InCl<sub>3</sub> and LiNH<sub>2</sub> without LiCl-KCl at (a) 400°C, (b) 450°C, (c) 500°C and (d) 550°C.
- Fig. S6: (a) Absorption spectra and (b) band gap determination of InN thin films.
- Fig. S7: Current potential curves of the InN electrodes under Xe lamp illumination with 64R cut filter.
- Fig. S8: Mott-Schottky plots of InN electrodes for 400°C, 450°C and 500°C samples. Donor densities ( $N_D$ ) are also presented in the figure.

**Table S1.** The melting points of LiCl-KCl molten salt systems.

| Composition of molten salts (molar ratio) |      | Melting point |
|-------------------------------------------|------|---------------|
| LiCl                                      | KCl  |               |
| 0                                         | 100% | 770°C         |
| 20%                                       | 80%  | 707°C         |
| 40%                                       | 60%  | 589°C         |
| 60%                                       | 40%  | 353°C         |
| 80%                                       | 20%  | 450°C         |
| 100%                                      | 0    | 605°C         |

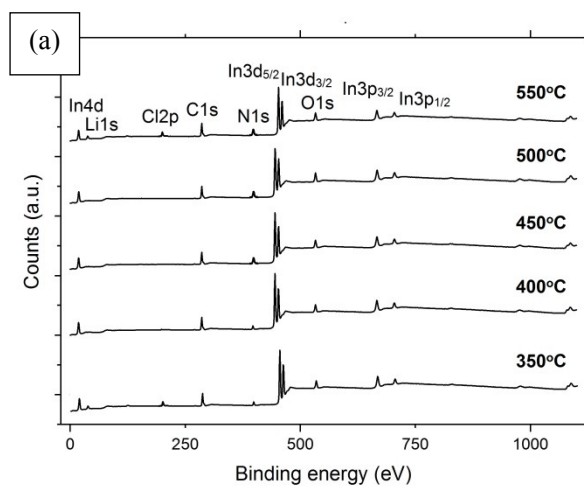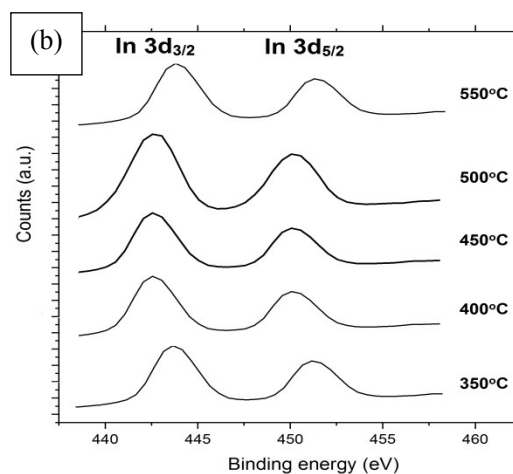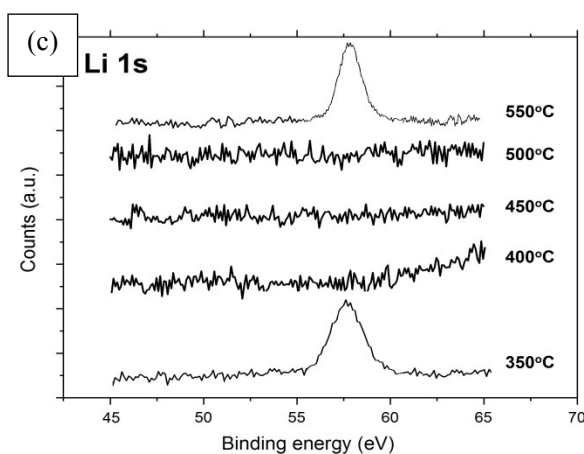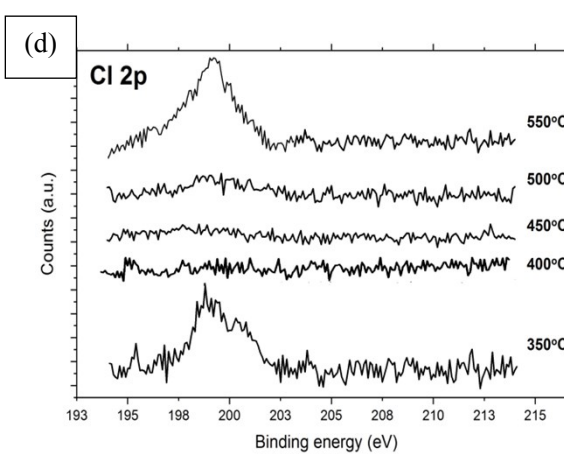

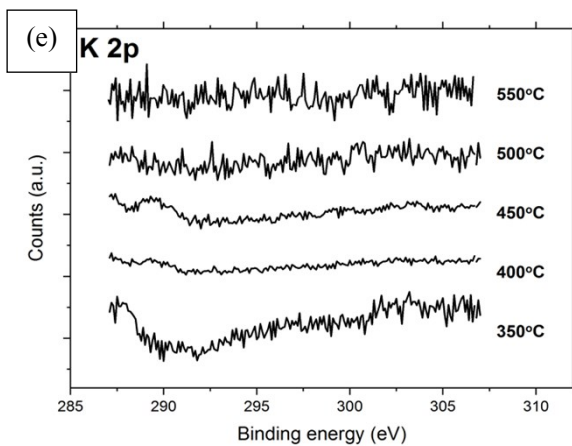

**Fig. S1** XPS spectra of InN samples: (a) whole region, (b) In 3d, (c) Li 1s, (d) Cl 2p and (e) K 2p.

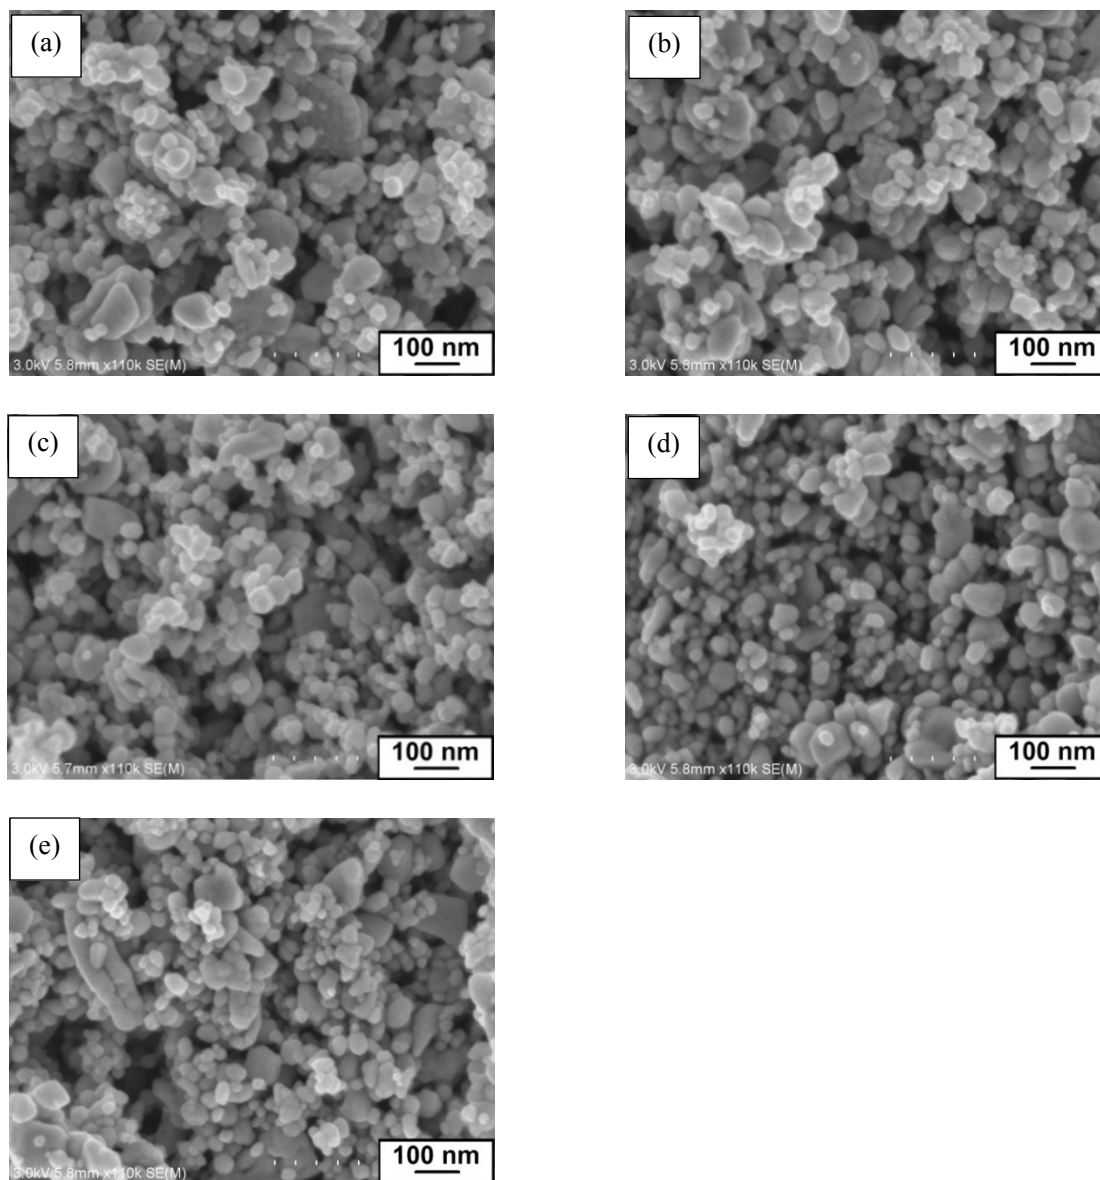

**Fig. S2** SEM images of InN crystals prepared by the reaction of  $\text{InCl}_3$ ,  $\text{LiNH}_2$  and  $\text{LiCl-KCl}$  at (a) 350°C, (b) 400°C, (c) 450°C, (d) 500°C and (e) 550°C.

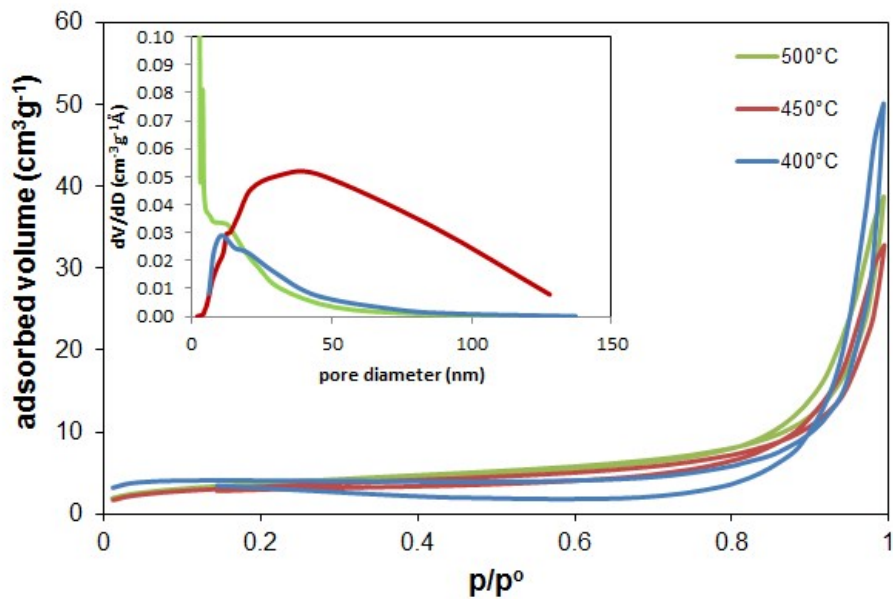

**Fig. S3** Brunauer-Emmett-Teller (BET) isotherms and Barret-Joyner-Halenda (BJH) pore-size distribution (inset) of InN synthesized at 400°C, 450°C and 500°C.

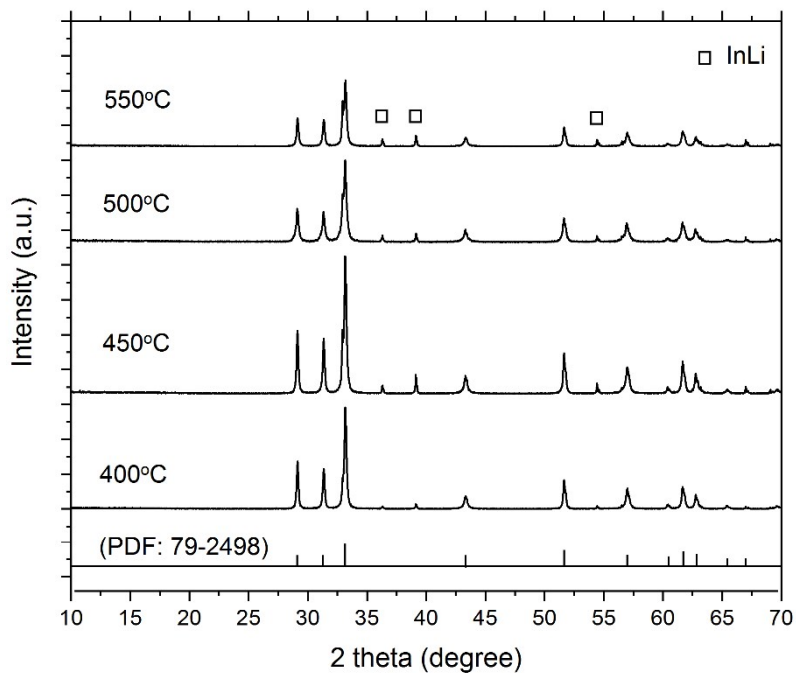

**Fig. S4** XRD patterns of InN synthesized using  $\text{InCl}_3$  and  $\text{LiNH}_2$  without  $\text{LiCl-KCl}$ . The reactions were carried out at 400°C, 450°C, 500°C and 550°C.

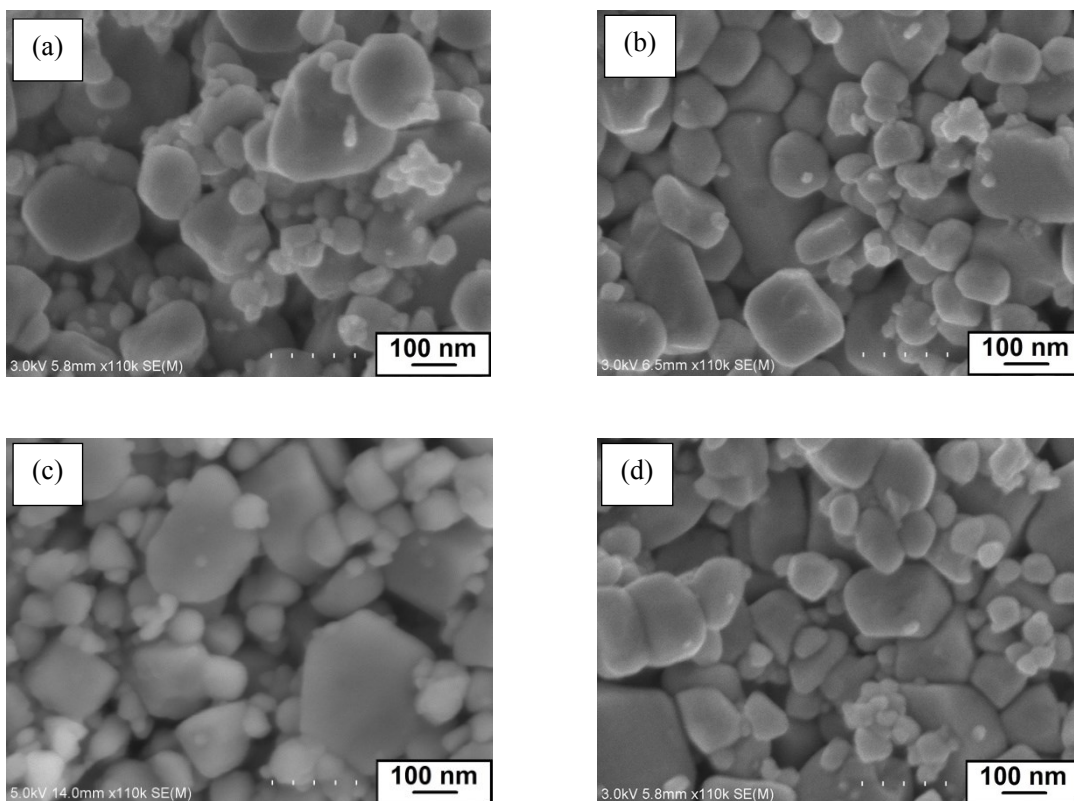

**Fig. S5** SEM images of InN synthesized using  $\text{InCl}_3$  and  $\text{LiNH}_2$  without  $\text{LiCl-KCl}$  at (a) 400°C, (b) 450°C, (c) 500°C and (d) 550°C.

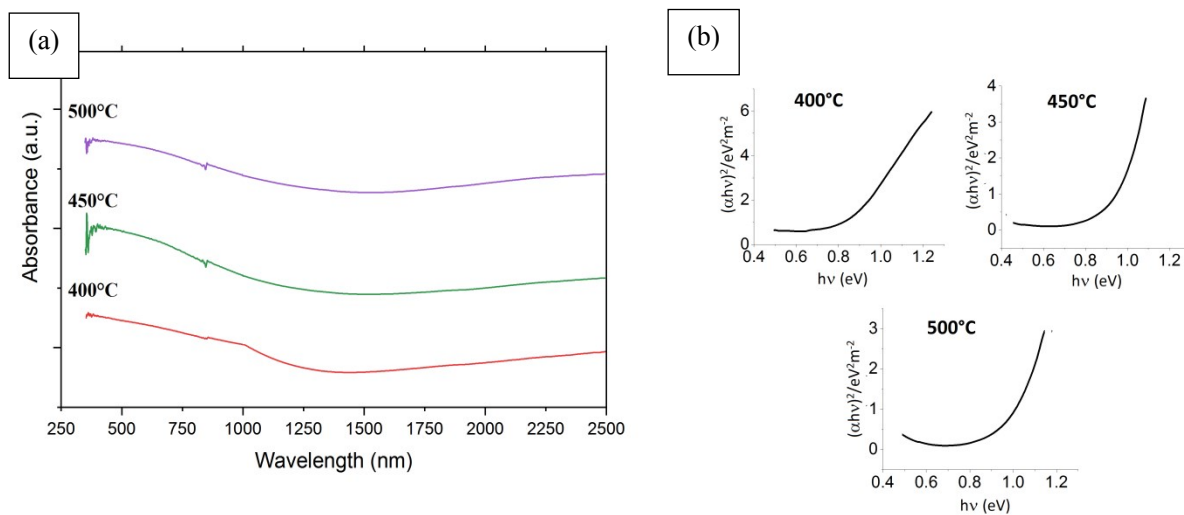

**Fig. S6** (a) Absorption spectra and (b) band gap determination of InN thin films.

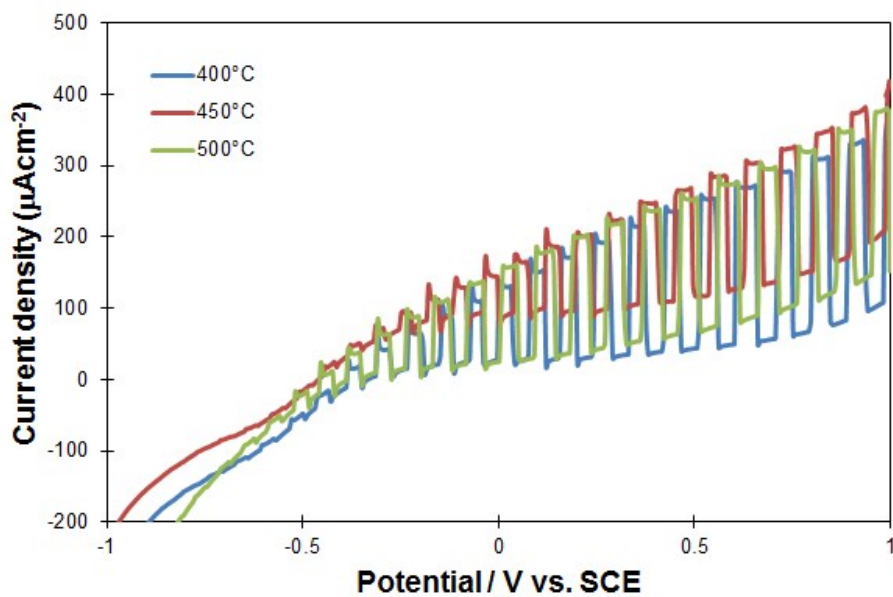

**Fig. S7** Current potential curves of the InN electrodes under Xe lamp illumination with 64R cut filter.

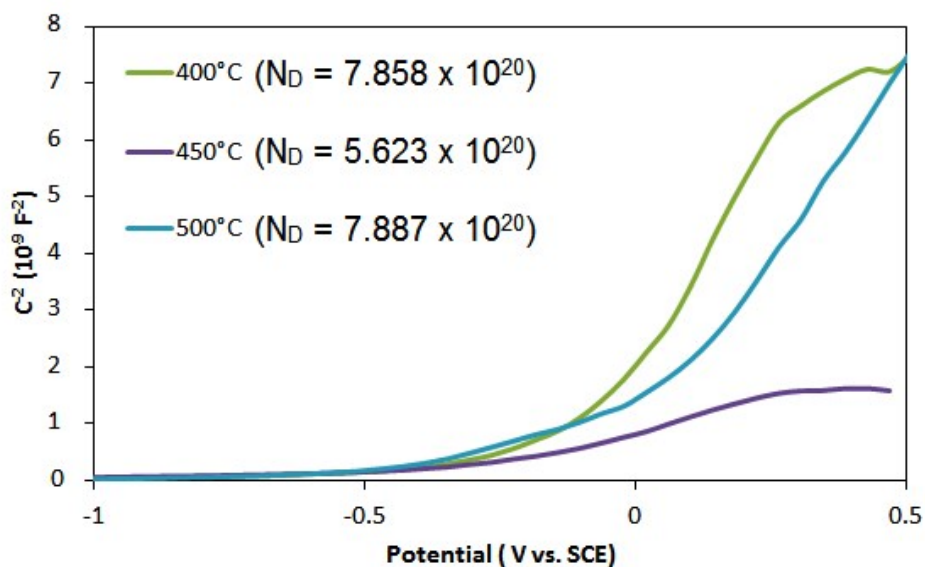

**Fig. S8** Mott-Schottky plots of InN electrodes for 400°C, 450°C and 500°C samples. Donor densities ( $N_D$ ) are also presented in the figure.
